# Supplementary material
Source: Royal Society of Chemistry journal article supplement (doi:10.1039/d6cy00189k)
Supplement: d6cy00189k1.pdf [file d6cy00189k1.pdf]

## Supporting information for

### Electrochemical Amination of Acetone using Ag as Cathode: Mechanism and Role of Pb Impurities for Hydrogen Transfer

Yani Guan,<sup>[a]</sup> Justus Kümper,<sup>[b]</sup> Angelina Cuomo,<sup>[c,d]</sup> Simran Kumari,<sup>[a]</sup> Sonja D.  
Mürtz,<sup>[b]</sup> Pavlo Nikolaienko,<sup>[c]</sup> Karl J. J. Mayrhofer,<sup>\*[c,d]</sup> Regina Palkovits<sup>\*[b,e]</sup> and  
Philippe Sautet<sup>\*[a,f]</sup>

[a] Department of Chemical and Biomolecular Engineering,  
University of California Los Angeles,  
Los Angeles, CA 90095, USA

[b] Chair of Heterogeneous Catalysis and Technical Chemistry  
RWTH Aachen University  
Worringerweg 2, 52074 Aachen (Germany)

[c] Helmholtz Institute Erlangen-Nürnberg for Renewable Energy (IET-2)  
Forschungszentrum Jülich GmbH  
Cauerstr. 1, 91058 Erlangen, Germany

[d] Department of Chemical and Biological Engineering  
Friedrich-Alexander University Erlangen-Nürnberg  
Cauerstr. 1, 91058 Erlangen, Germany

[e] Institute for a Sustainable Hydrogen Economy (IHE-2), Forschungszentrum  
Jülich, An der Deutschen Welle 7a,, 52428 Jülich, Germany

[f] Department of Chemistry and Biochemistry,  
University of California Los Angeles,  
Los Angeles, CA 90095, USA

\*k.mayrhofer@fz-juelich.de

\*[palkovits@itmc.rwth-aachen.de](mailto:palkovits@itmc.rwth-aachen.de) / [r.palkovits@fz-juelich.de](mailto:r.palkovits@fz-juelich.de)

\*sautet@ucla.edu

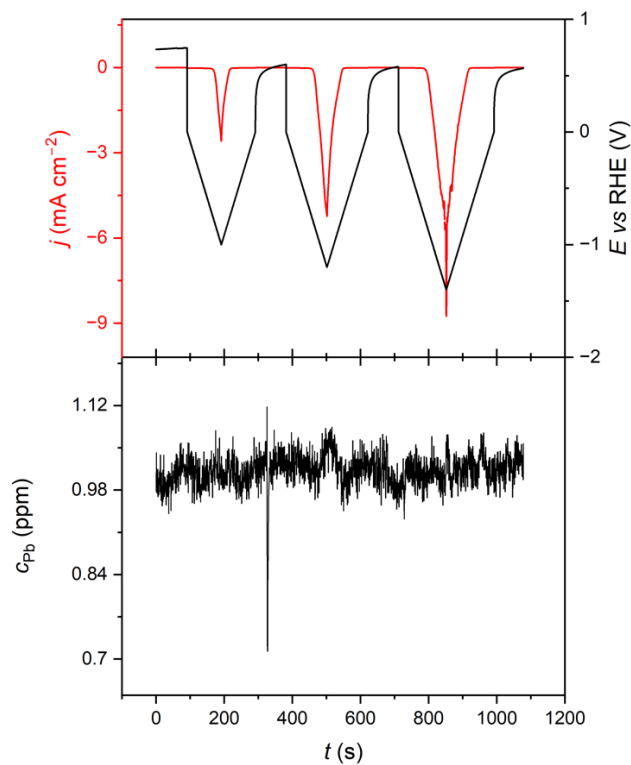

**Figure S1.** Impact of the applied potential on Pb concentration in the electrolyte, to prove whether Pb is irreversibly deposited on the GC electrode. The electrolyte contained 1 ppm Pb that was introduced as  $\text{Pb}(\text{NO}_3)_2$ . No decrease in Pb concentration was measured, illustrating that under these conditions no irreversible deposition was present. Signal at 300 s represents a measurement inaccuracy as it was only measured once and is located between two CV measurements. (Conditions: WE: GC, CE: GC; scan rate:  $10 \text{ mV s}^{-1}$ ; solvent:  $0.5 \text{ M KH}_2\text{PO}_4$ ; substrate: acetone:  $2.4 \text{ M}$ , methylamine:  $2.9 \text{ M}$ ; pH of the final reaction solution: 13).

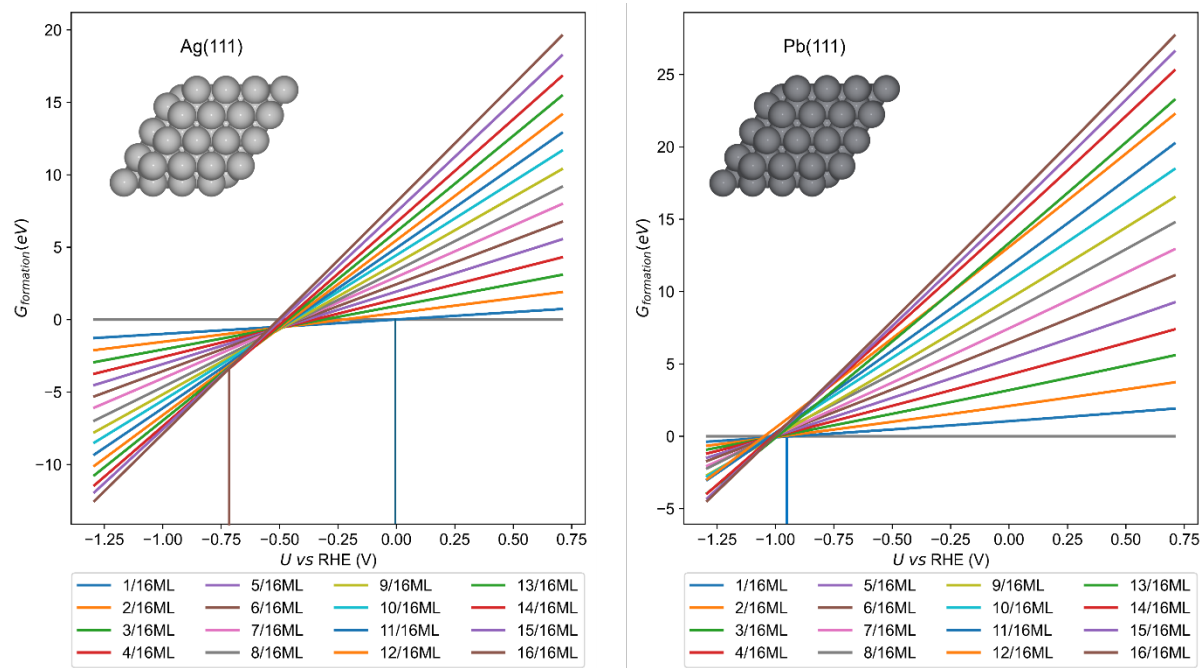

**Figure S2.** Hydrogen affinity of Ag and Pb, where 4 x 4 Ag (111) and Pb(111) surface were constructed to check the thermodynamic stability of H coverage from 1/16ML to 16/16ML.

To assess the role of hydrogen evolution as a competing side reaction in Pb-mediated electrochemical systems, we systematically investigated HER involving surface-bound Pb–H species by combining thermodynamic analysis, potential-dependent CHE modeling, and explicit-solvent kinetic calculations. Surface-bound Pb hydrides ( $\text{PbH}_4$ ,  $\text{PbH}_3$ , and  $\text{PbH}_2$ ) were found to form readily under strongly cathodic conditions, serving as key hydrogen reservoirs at the interface. Thermodynamic analysis shows that H–H coupling and hydrogen release from  $\text{PbH}_x$  species are exergonic across a wide potential window, with the relative stability of hydrides evolving as a function of electrode potential. In particular, higher-order hydrides are favored at moderate cathodic potentials, whereas  $\text{PbH}_2$  becomes thermodynamically dominant under more negative conditions, indicating progressive hydride depletion upon hydrogen evolution.

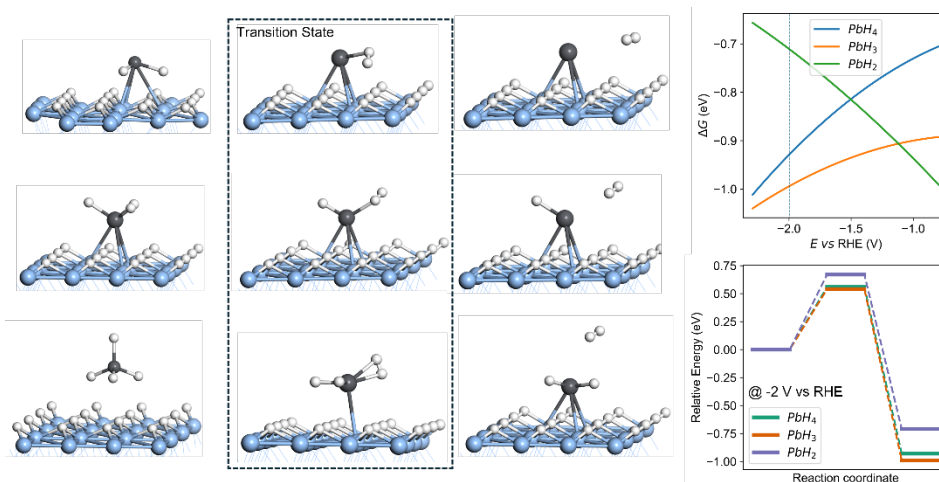

**Figure S3.** Hydrogen evolution reaction (HER) pathways with surface-bound Pb hydrides ( $\text{PbH}_4$ ,  $\text{PbH}_3$ , and  $\text{PbH}_2$ ) participating in H–H bond formation

Using the computational hydrogen electrode (CHE) framework, we evaluated a Heyrovsky-type HER pathway in which a proton–electron pair from solution reacts with a surface-bound hydride to form  $\text{H}_2$ . The resulting potential-dependent free energies reveal that  $\text{PbH}_x$  species exhibit distinct reactivities toward hydrogen evolution, with  $\text{PbH}_3$  displaying the most favorable thermodynamics for  $\text{H}_2$  formation, while  $\text{PbH}_4$  is comparatively less reactive. These trends reflect differences in Pb–H bond strength and hydrogen chemical potential, highlighting the sensitivity of HER thermodynamics to hydride stoichiometry.

To further validate the kinetic feasibility of HER, we explicitly modeled protonation steps using water clusters to represent the local solvation environment. Water-assisted proton transfer proceeds through a hydrogen-bonded relay mechanism, yielding moderate activation barriers that remain accessible under operating electrochemical conditions. Consistent with the thermodynamic analysis,  $\text{PbH}_3$  exhibits the lowest protonation barrier, whereas  $\text{PbH}_4$  displays a higher kinetic penalty, indicating that highly hydrogenated Pb centers are kinetically less prone to immediate hydrogen evolution.

Taken together, these results demonstrate that surface-bound Pb–H species can actively participate in hydrogen evolution via both hydride coupling and Heyrovsky-type pathways.

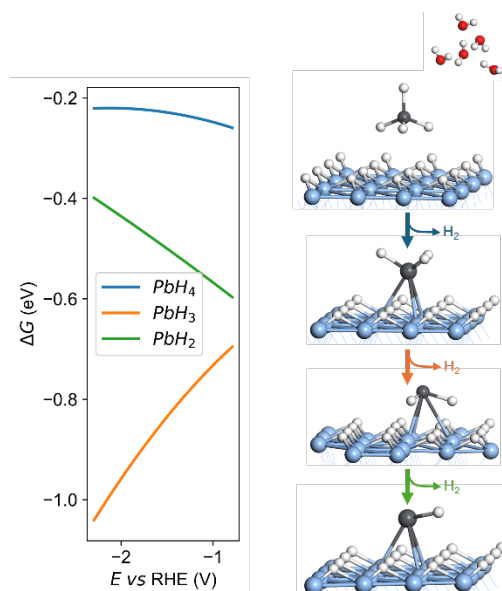

**Figure S4.** Potential-dependent thermodynamics of Heyrovsky-type HER on Pb–H<sub>x</sub> species

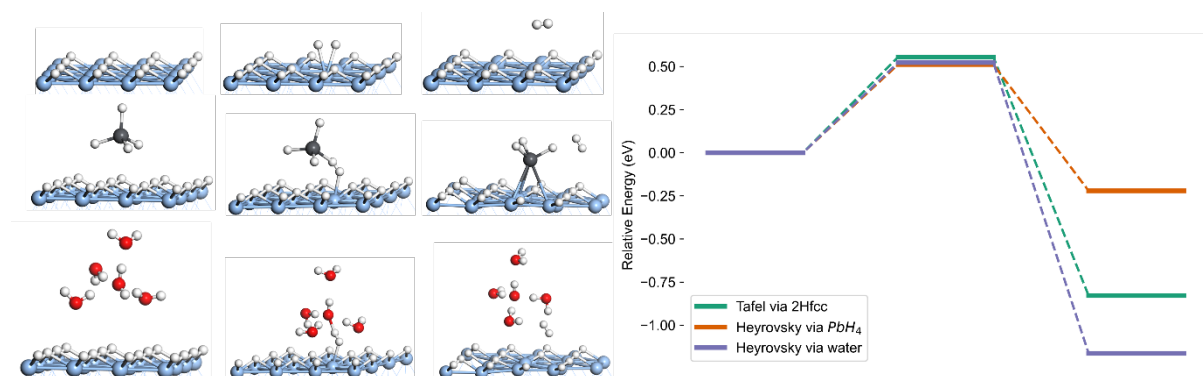

**Figure S5.** Tafel HER on 16/16 ML Ag (111) surface in green, Heyrovsky HER via solvent water in purple and Heyrovsky-like HER via PbH<sub>4</sub> in orange.

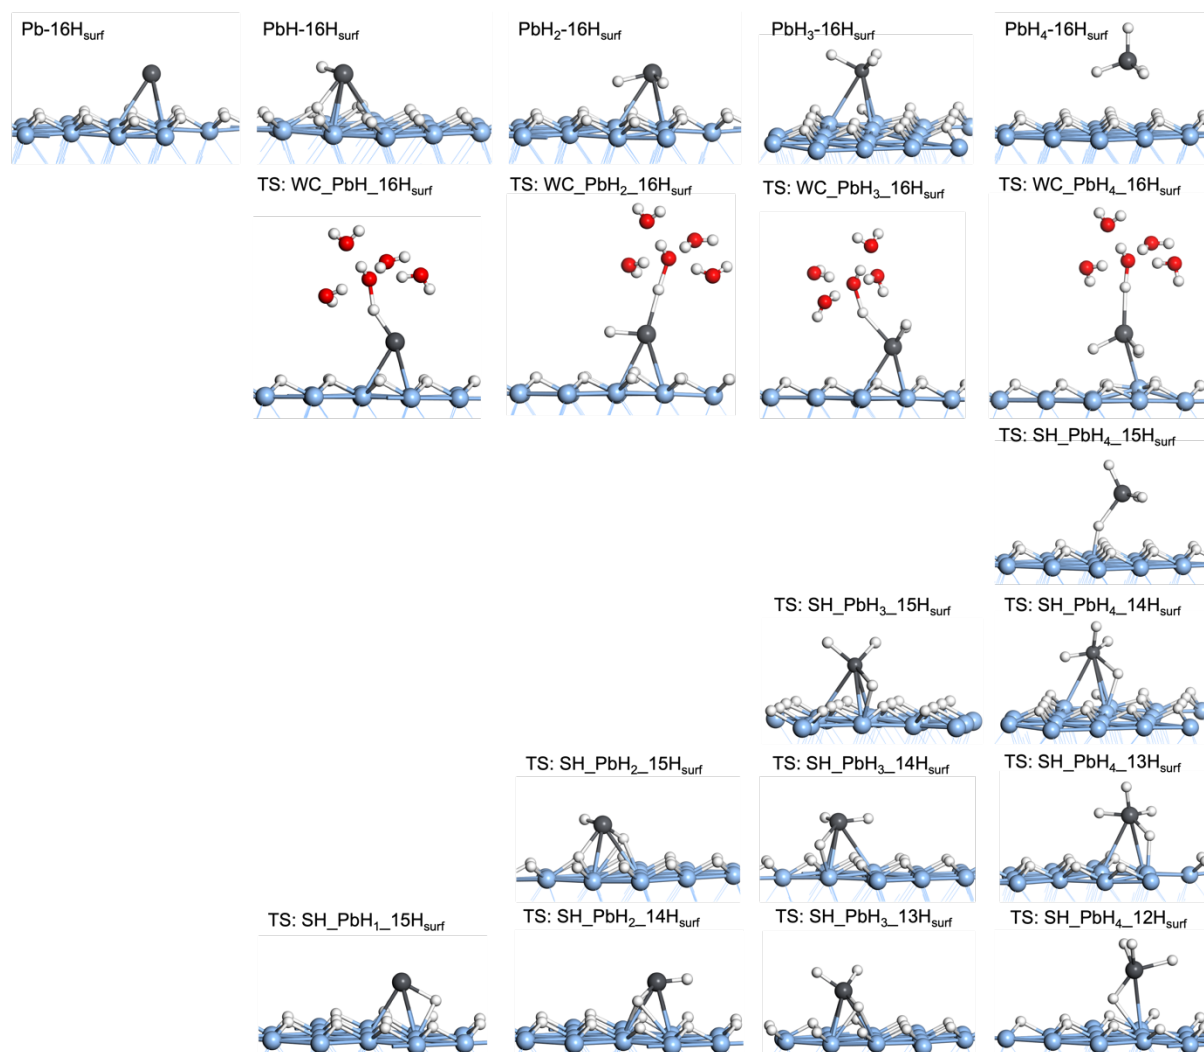

**Figure S6.** Depicts the structures corresponding to Figure 2d in the main text. The top row shows the optimized Pb hydride species from Pb through  $\text{PbH}_4$ , and the second row presents the transition-state structures for the proton-coupled electron transfer (PCET) pathway. From the third row onwards, the figure illustrates the transition-state structures for surface-mediated hydrogenation under total hydrogen coverages of 19, 18, 17, and 16 H, respectively.

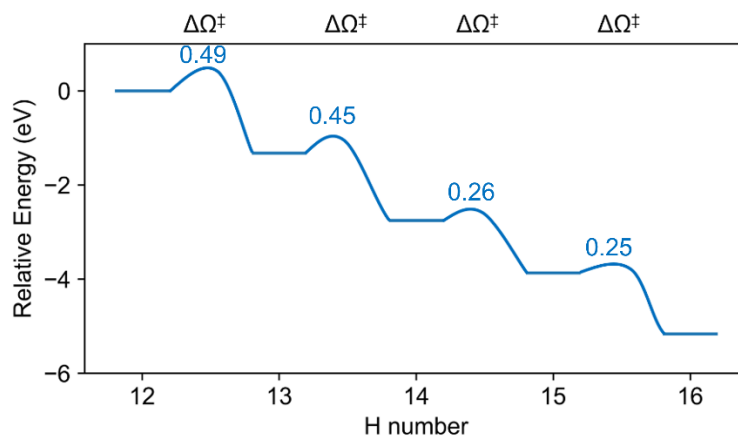

**Figure S7.** The kinetic profiles of Ag surface replenishment using solvent water cluster.

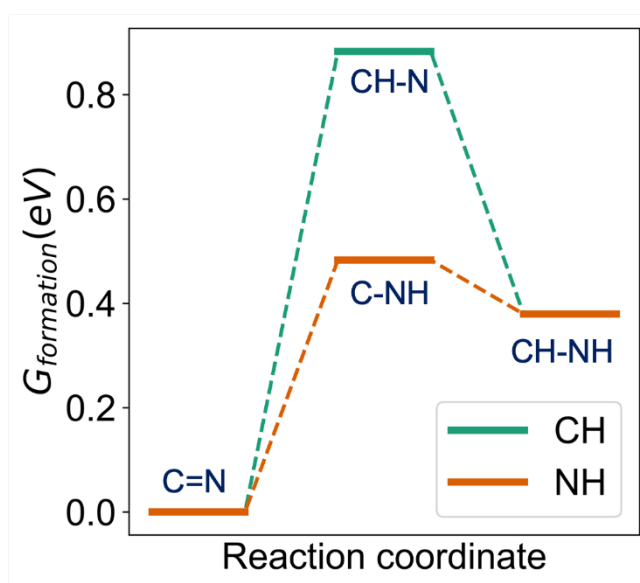

**Figure S8.** Reaction profiles of imine hydrogenation by  $\text{PbH}_2$  in solution.

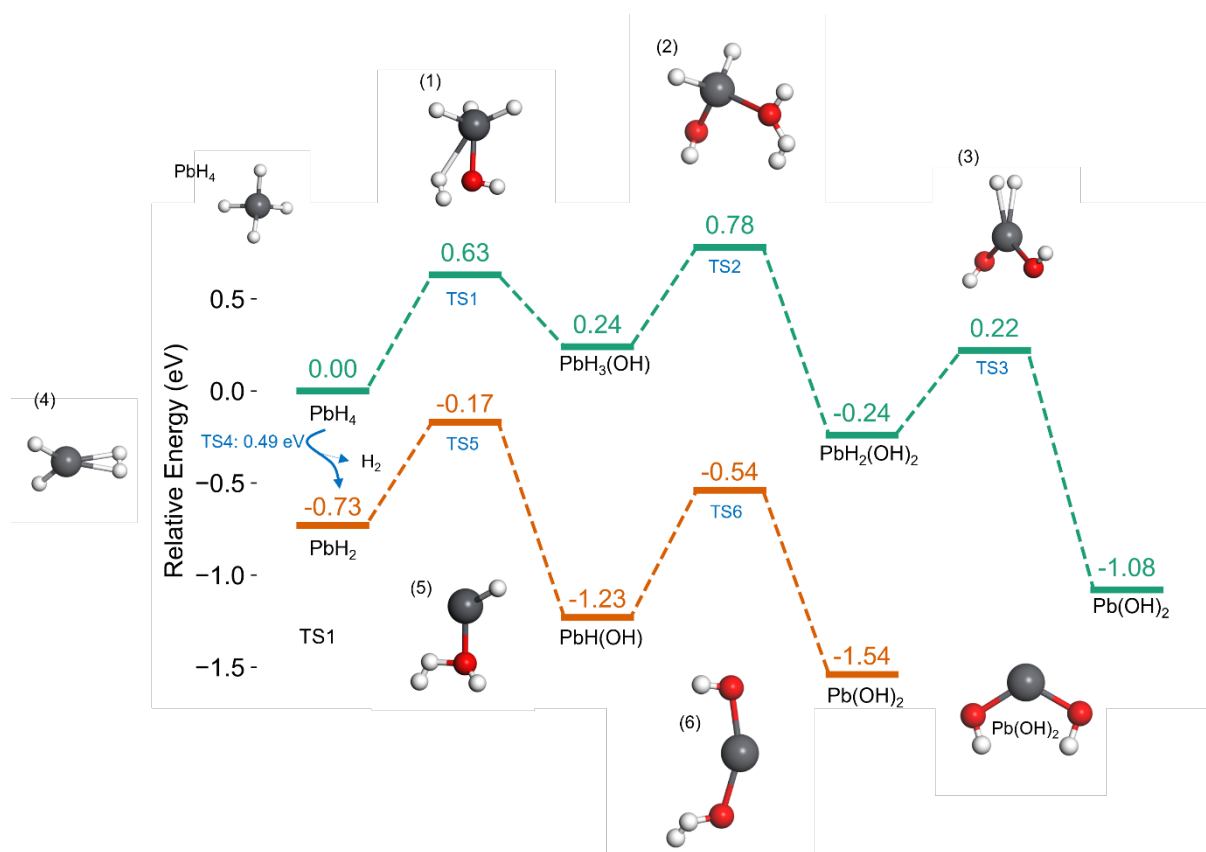

**Figure S9.** Calculated free-energy profile and key intermediates for the reaction of  $\text{PbH}_4$  (green) and  $\text{PbH}_2$  (orange) with water leading to  $\text{Pb(OH)}_2$  formation. All calculations were performed in a  $25 \text{ \AA} \times 25 \text{ \AA} \times 25 \text{ \AA}$  cubic simulation box with implicit solvation (VASPsol,  $\epsilon = 78.4$ ) to approximate the solution-phase reaction environment. Reaction barriers were obtained using the CI-NEB method.

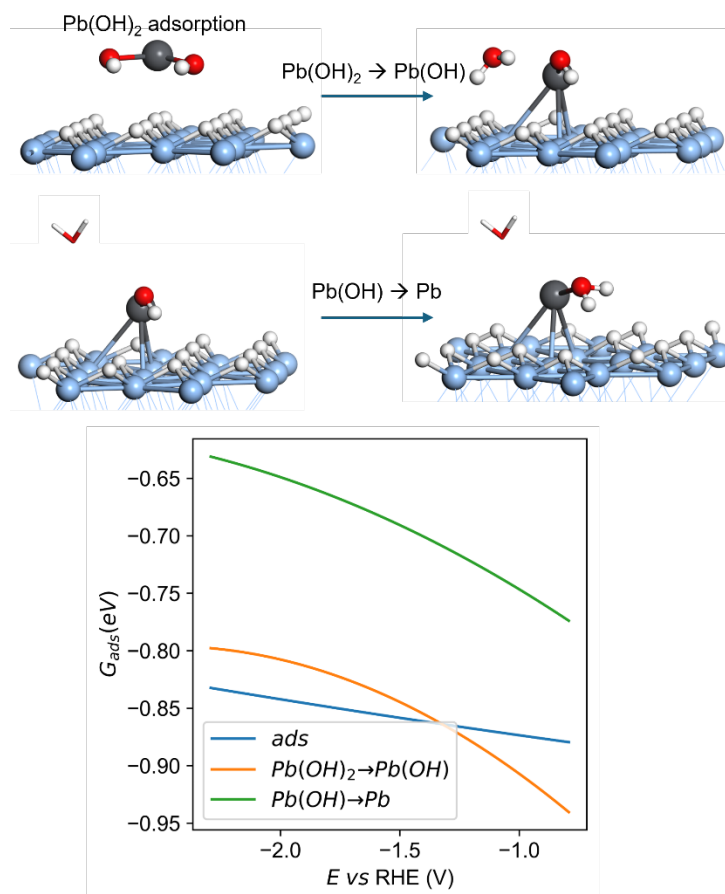

**Figure S10.** Adsorption structures and calculated free energies for the reduction of  $\text{Pb(OH)}_2$  on the hydrogen-covered  $\text{Ag(111)}$  surface. The reduction proceeds via transfer of surface-bound hydrogen atoms rather than direct PCET from solution:  $\text{Pb(OH)}_2^*/\text{H}_{16}\text{-Ag} + \text{H}^* \rightarrow \text{Pb(OH)}^*/\text{H}_{15}\text{-Ag} + \text{H}_2\text{O}$ , and  $\text{Pb(OH)}^*/\text{H}_{15}\text{-Ag} + \text{H}^* \rightarrow \text{Pb}^*/\text{H}_{14}\text{-Ag} + \text{H}_2\text{O}$ .

The potential dependence of these hydrogen transfer steps arises from differences in the surface charge distribution between the reactant and product states, which couple differently to the applied electrode potential within the grand canonical DFT framework.

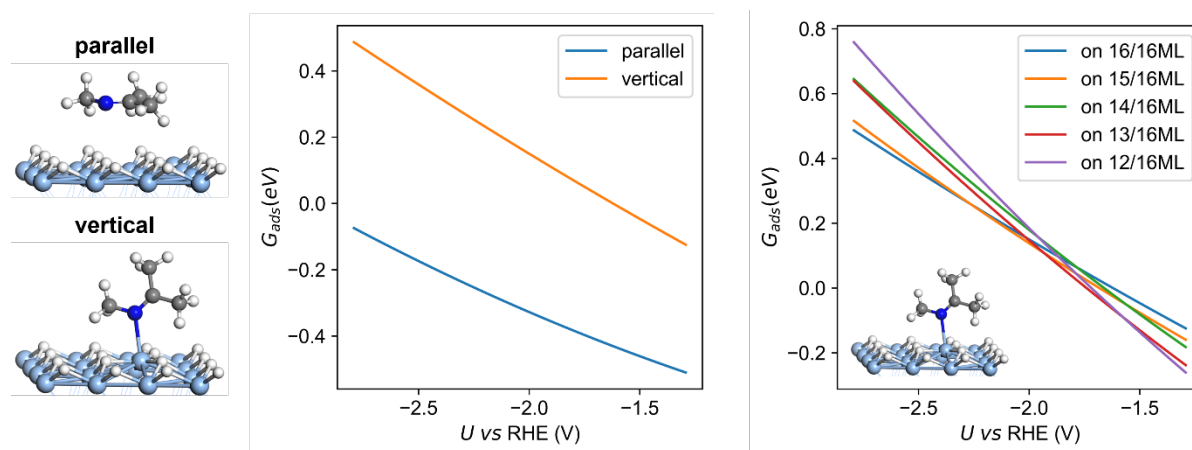

**Figure S11.** The adsorption of imine on electrified Ag surface: The first part shows the adsorption modes of imine via parallel and vertical ways on the surface; the second part shows the Gibbs adsorption energies of these two modes under different potential conditions; and the third part shows the vertical adsorption energies with potential at several H coverage from 16/16ML to 12/16ML.

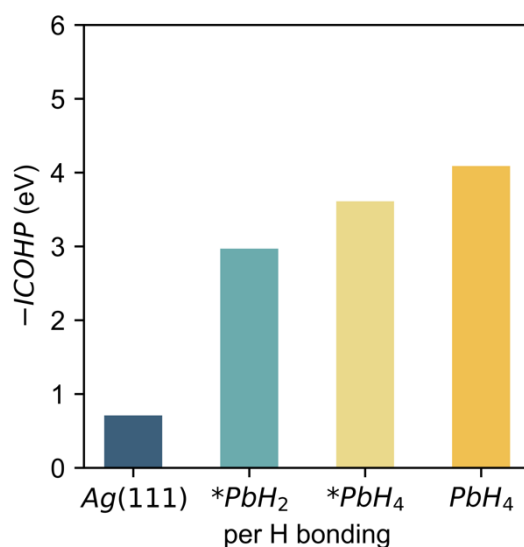

**Figure S12.** Pb-H bond strength in PbH<sub>2</sub>, PbH<sub>4</sub> on the surface, and PbH<sub>4</sub> in the solution illustrated by the Integrated crystal orbital Hamilton population (ICOHP).

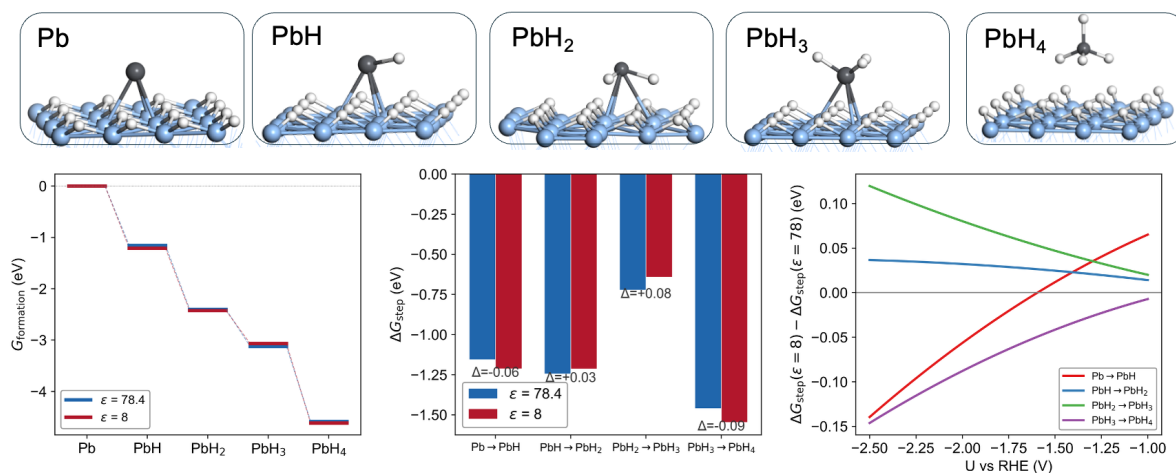

**Figure S13.** Sensitivity test of the implicit solvation dielectric constant on  $\text{PbH}_n$  formation energetics. Top: optimized structures of Pb, PbH,  $\text{PbH}_2$ ,  $\text{PbH}_3$  adsorbed on the H-covered Ag(111) surface and  $\text{PbH}_4$  in the solution phase after desorption. Bottom: (a) cumulative formation energy diagram at  $U = -2$  V vs RHE, comparing  $\epsilon = 78.4$  (blue) and  $\epsilon = 8$  (red); (b) step formation energies at  $U = -2$  V vs RHE with differences ( $\Delta$ ) labeled for each step; (c) potential dependence of the difference in step formation energies between  $\epsilon = 8$  and  $\epsilon = 78.4$  across the experimental potential range.
